# Supplementary material
Source: PubMed Central journal article supplement (PMC4163122)

**Figure S1.** Negative-ion ESI-MS of the standard ODN harboring a 5-gHmdC (A) and the product-ion spectrum of the  $[M-3H]^{3-}$  ion (B).

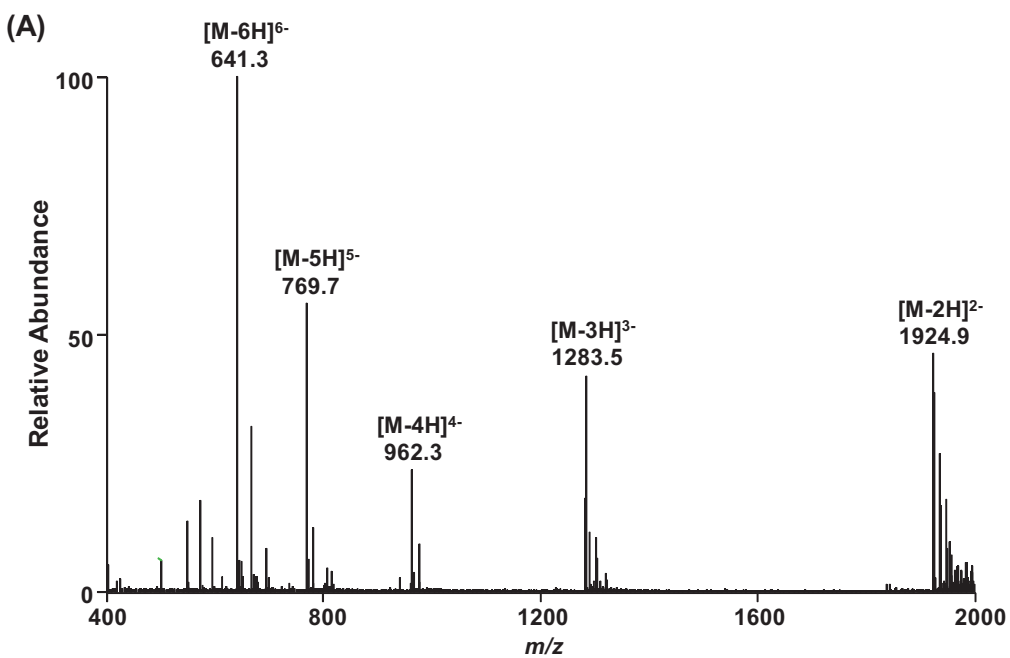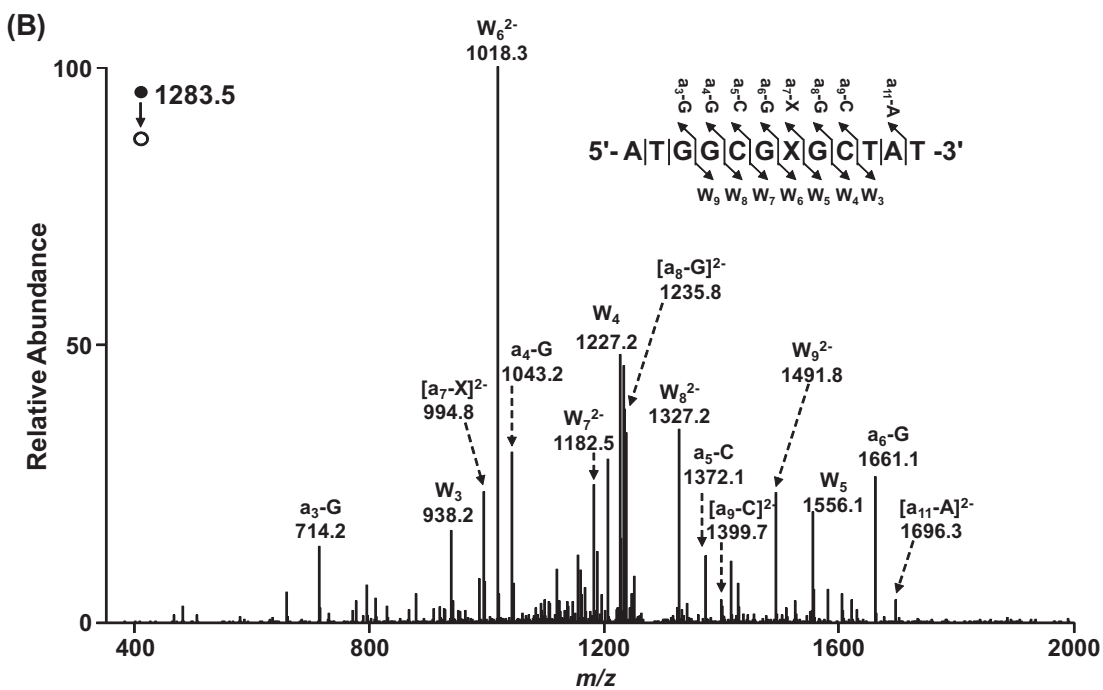

Supplement: NIHMS617857-supplement-13361_2014_960_MOESM1_ESM.pdf [file NIHMS617857-supplement-13361_2014_960_MOESM1_ESM.pdf]
