# Supplementary material
Source: PubMed Central journal article supplement (PMC4163122)

**Figure S2.** The calibration curve for the quantification of dJ by LC-MS/MS with the use of a surrogate internal standard method. Plotted are the ratios of areas of peaks found in the selected-ion chromatograms for monitoring the transitions as shown in Figures 2B and 2A versus the molar ratios of dJ over that of 5-gHmdC standard (100 fmol for 5-gHmdC-containing ODN was used). The data represent the mean and standard deviation of the measurement results obtained on three separated days.

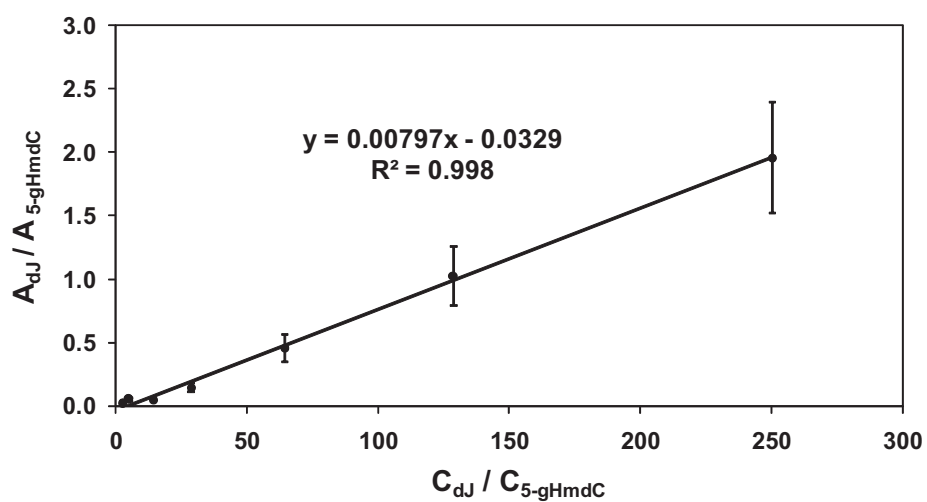

Supplement: NIHMS617857-supplement-13361_2014_960_MOESM2_ESM.pdf [file NIHMS617857-supplement-13361_2014_960_MOESM2_ESM.pdf]
